# Supplementary material for: Degradome sequencing-based identification of phasiRNAs biogenesis pathways in Oryza sativa
Source: PubMed Central journal article supplement (PMC7847607; doi:10.1186/s12864-021-07406-7), 2021-01-30

**A**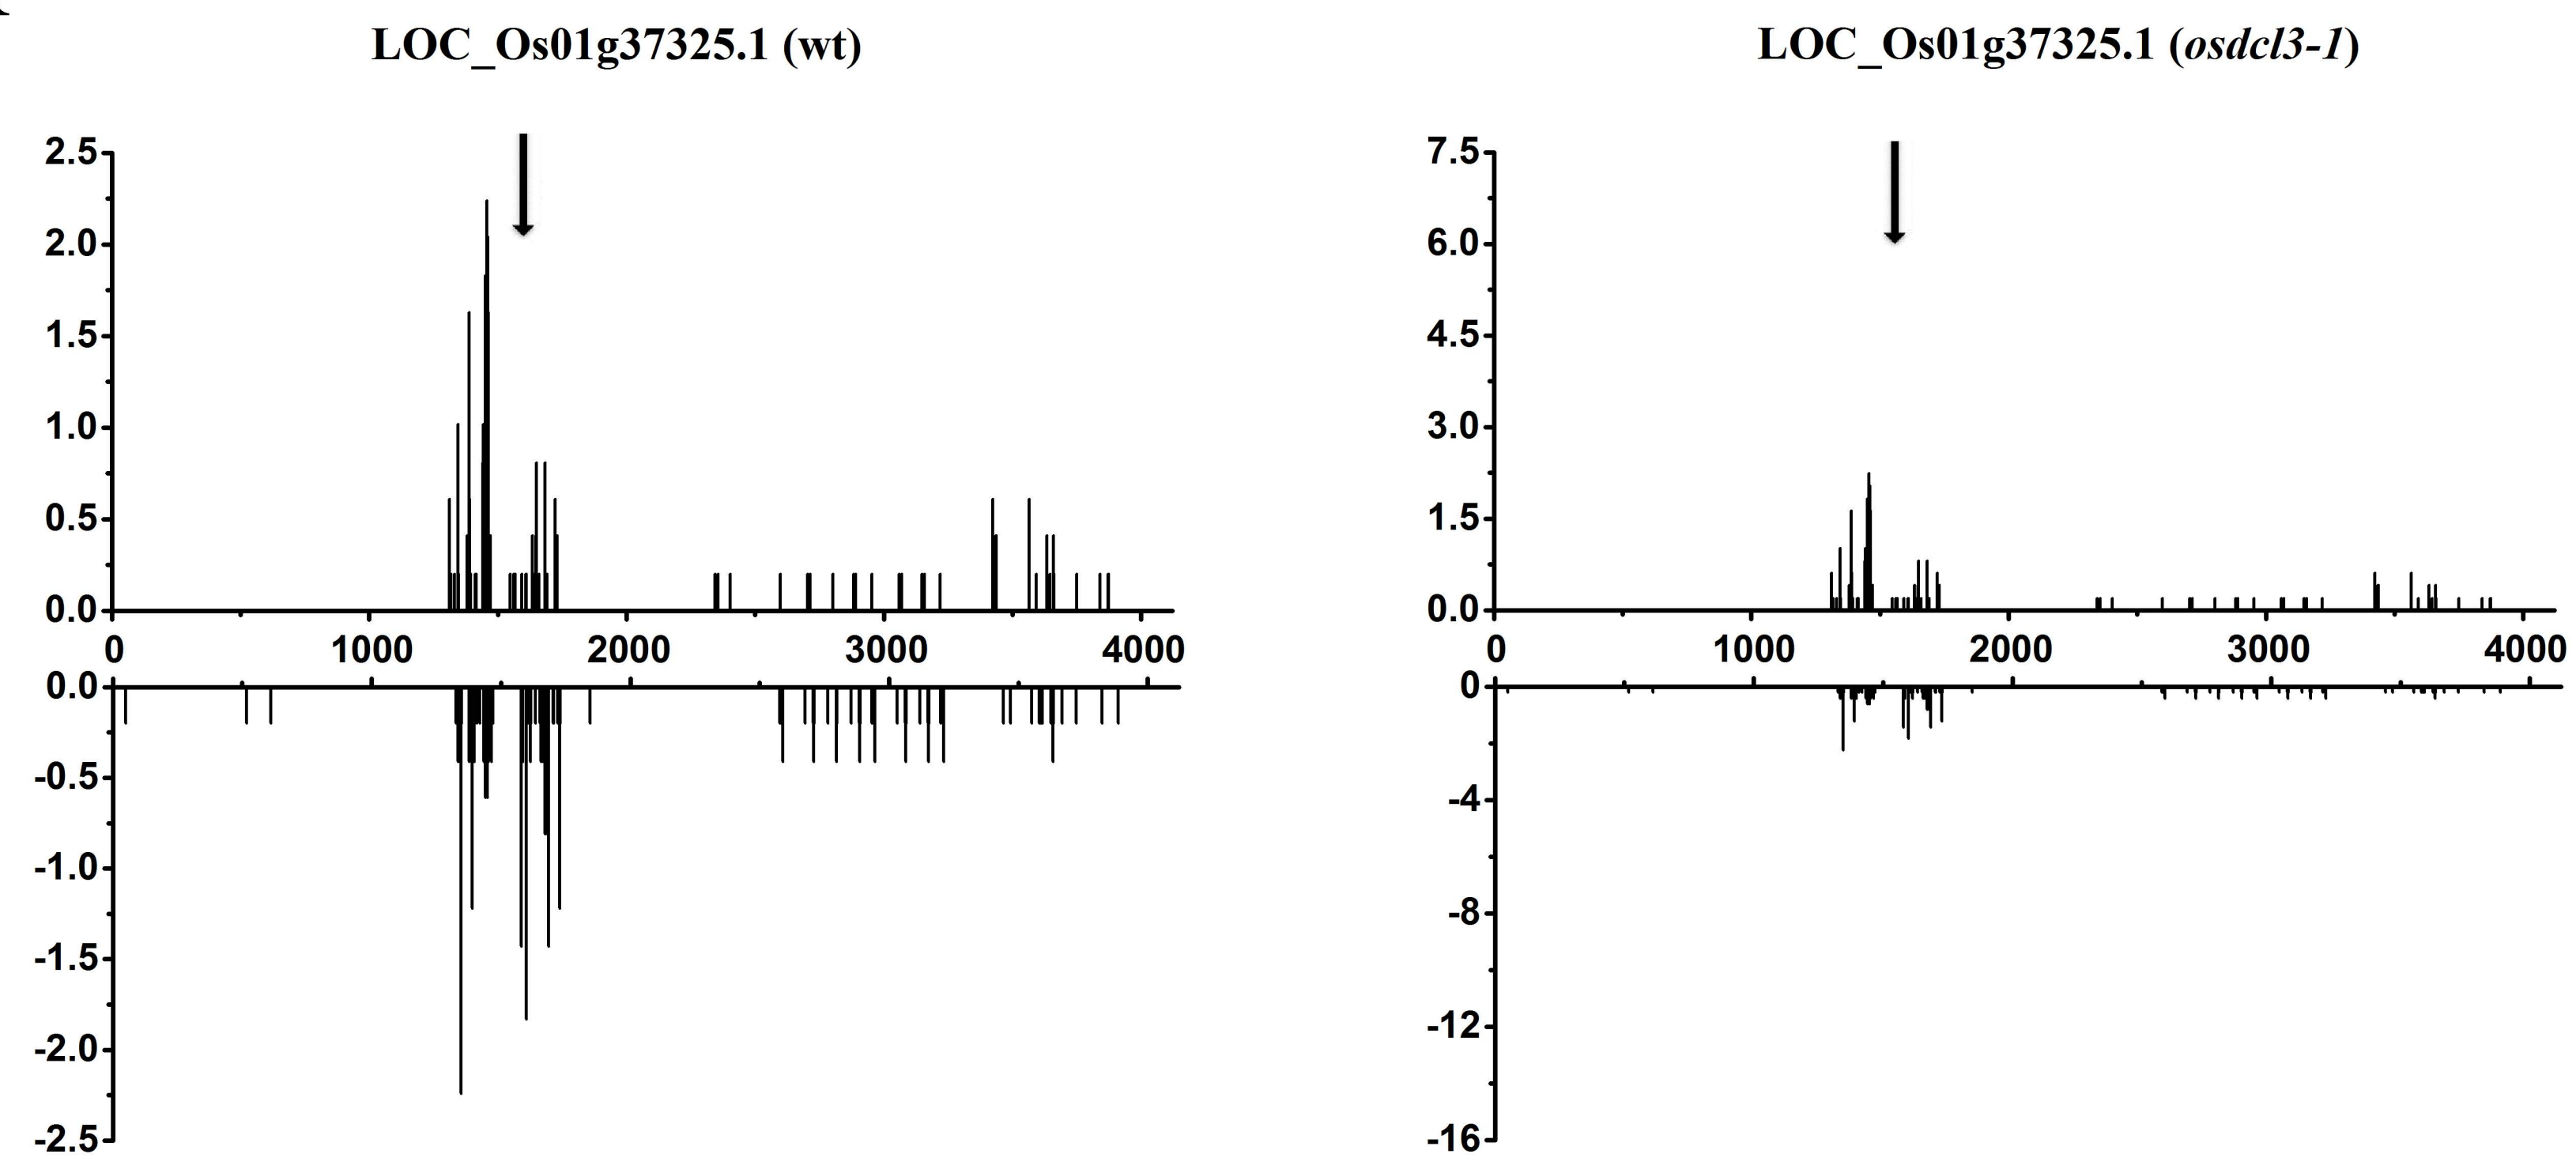**B**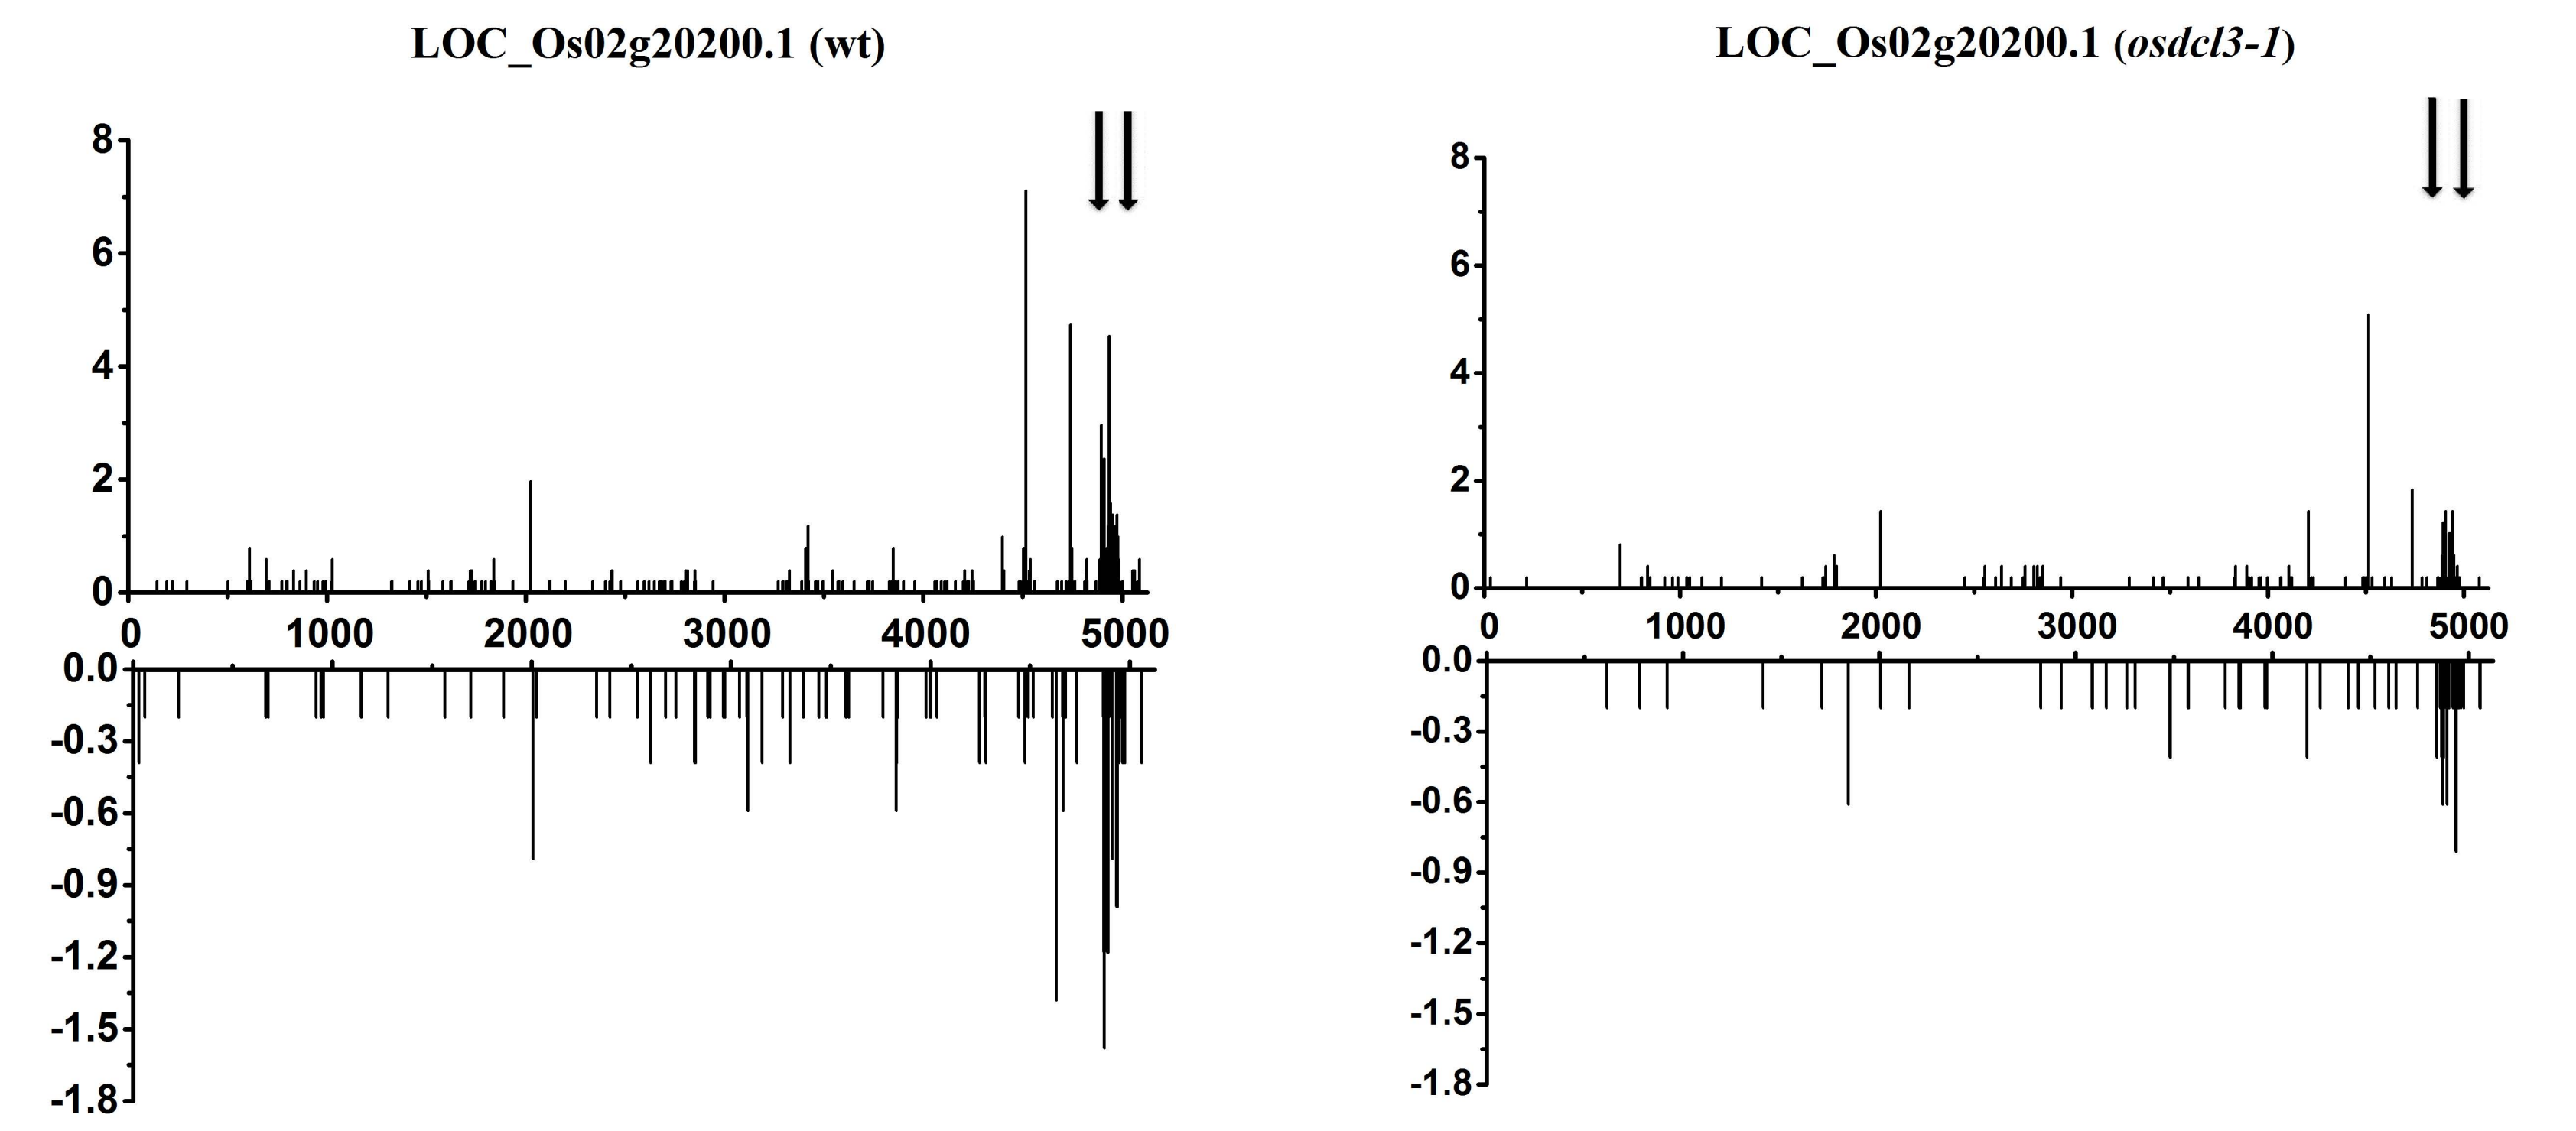**C**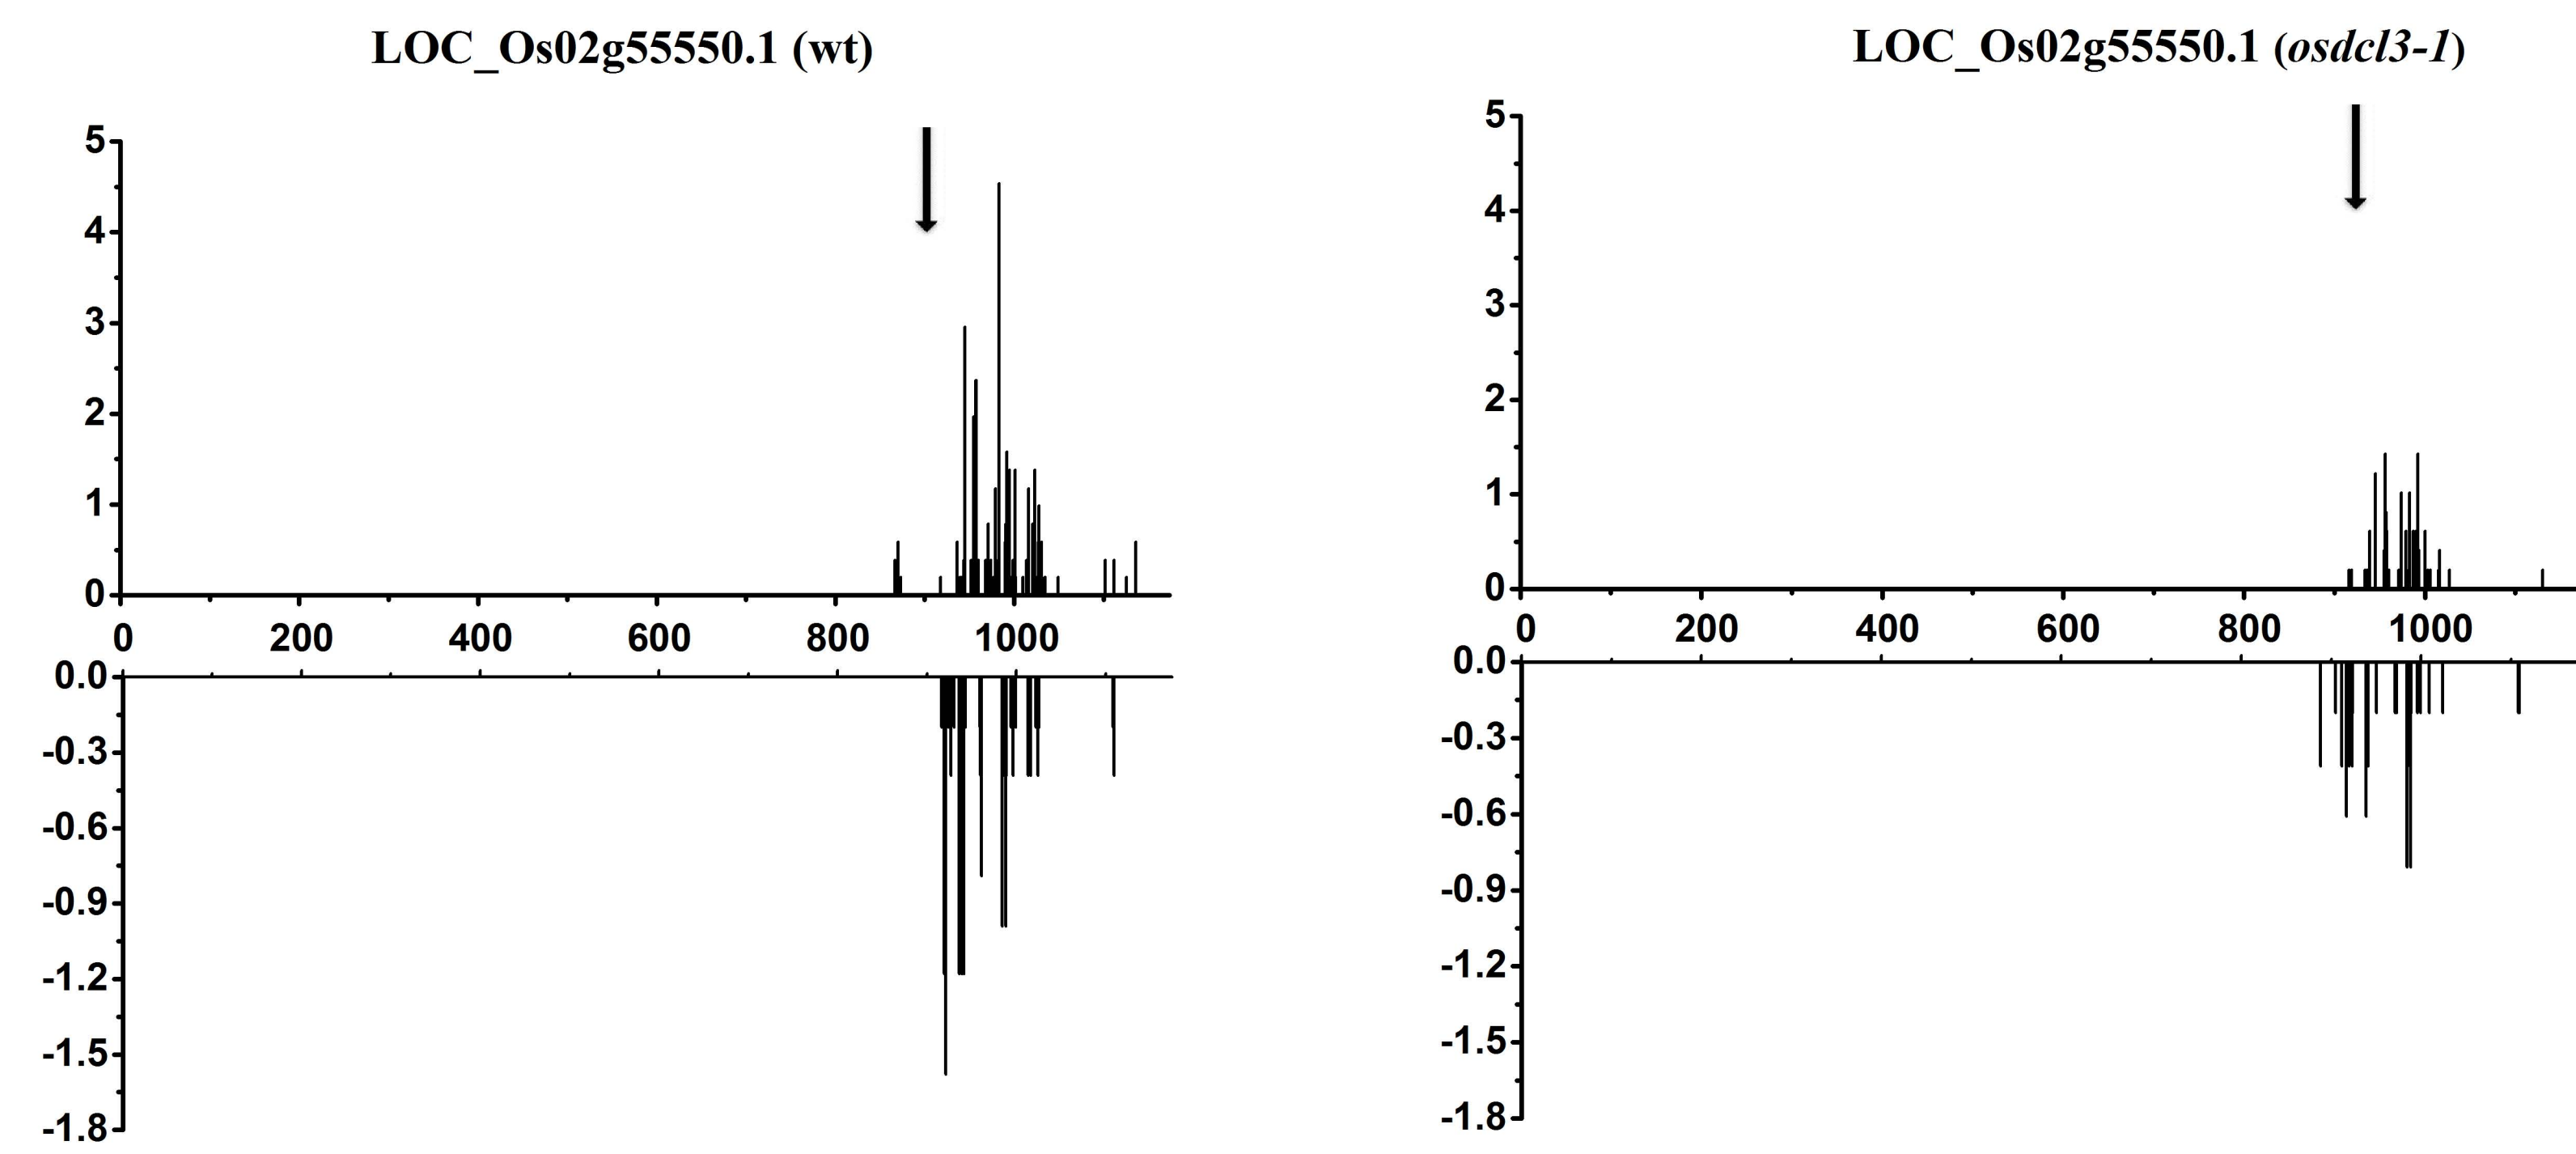**D**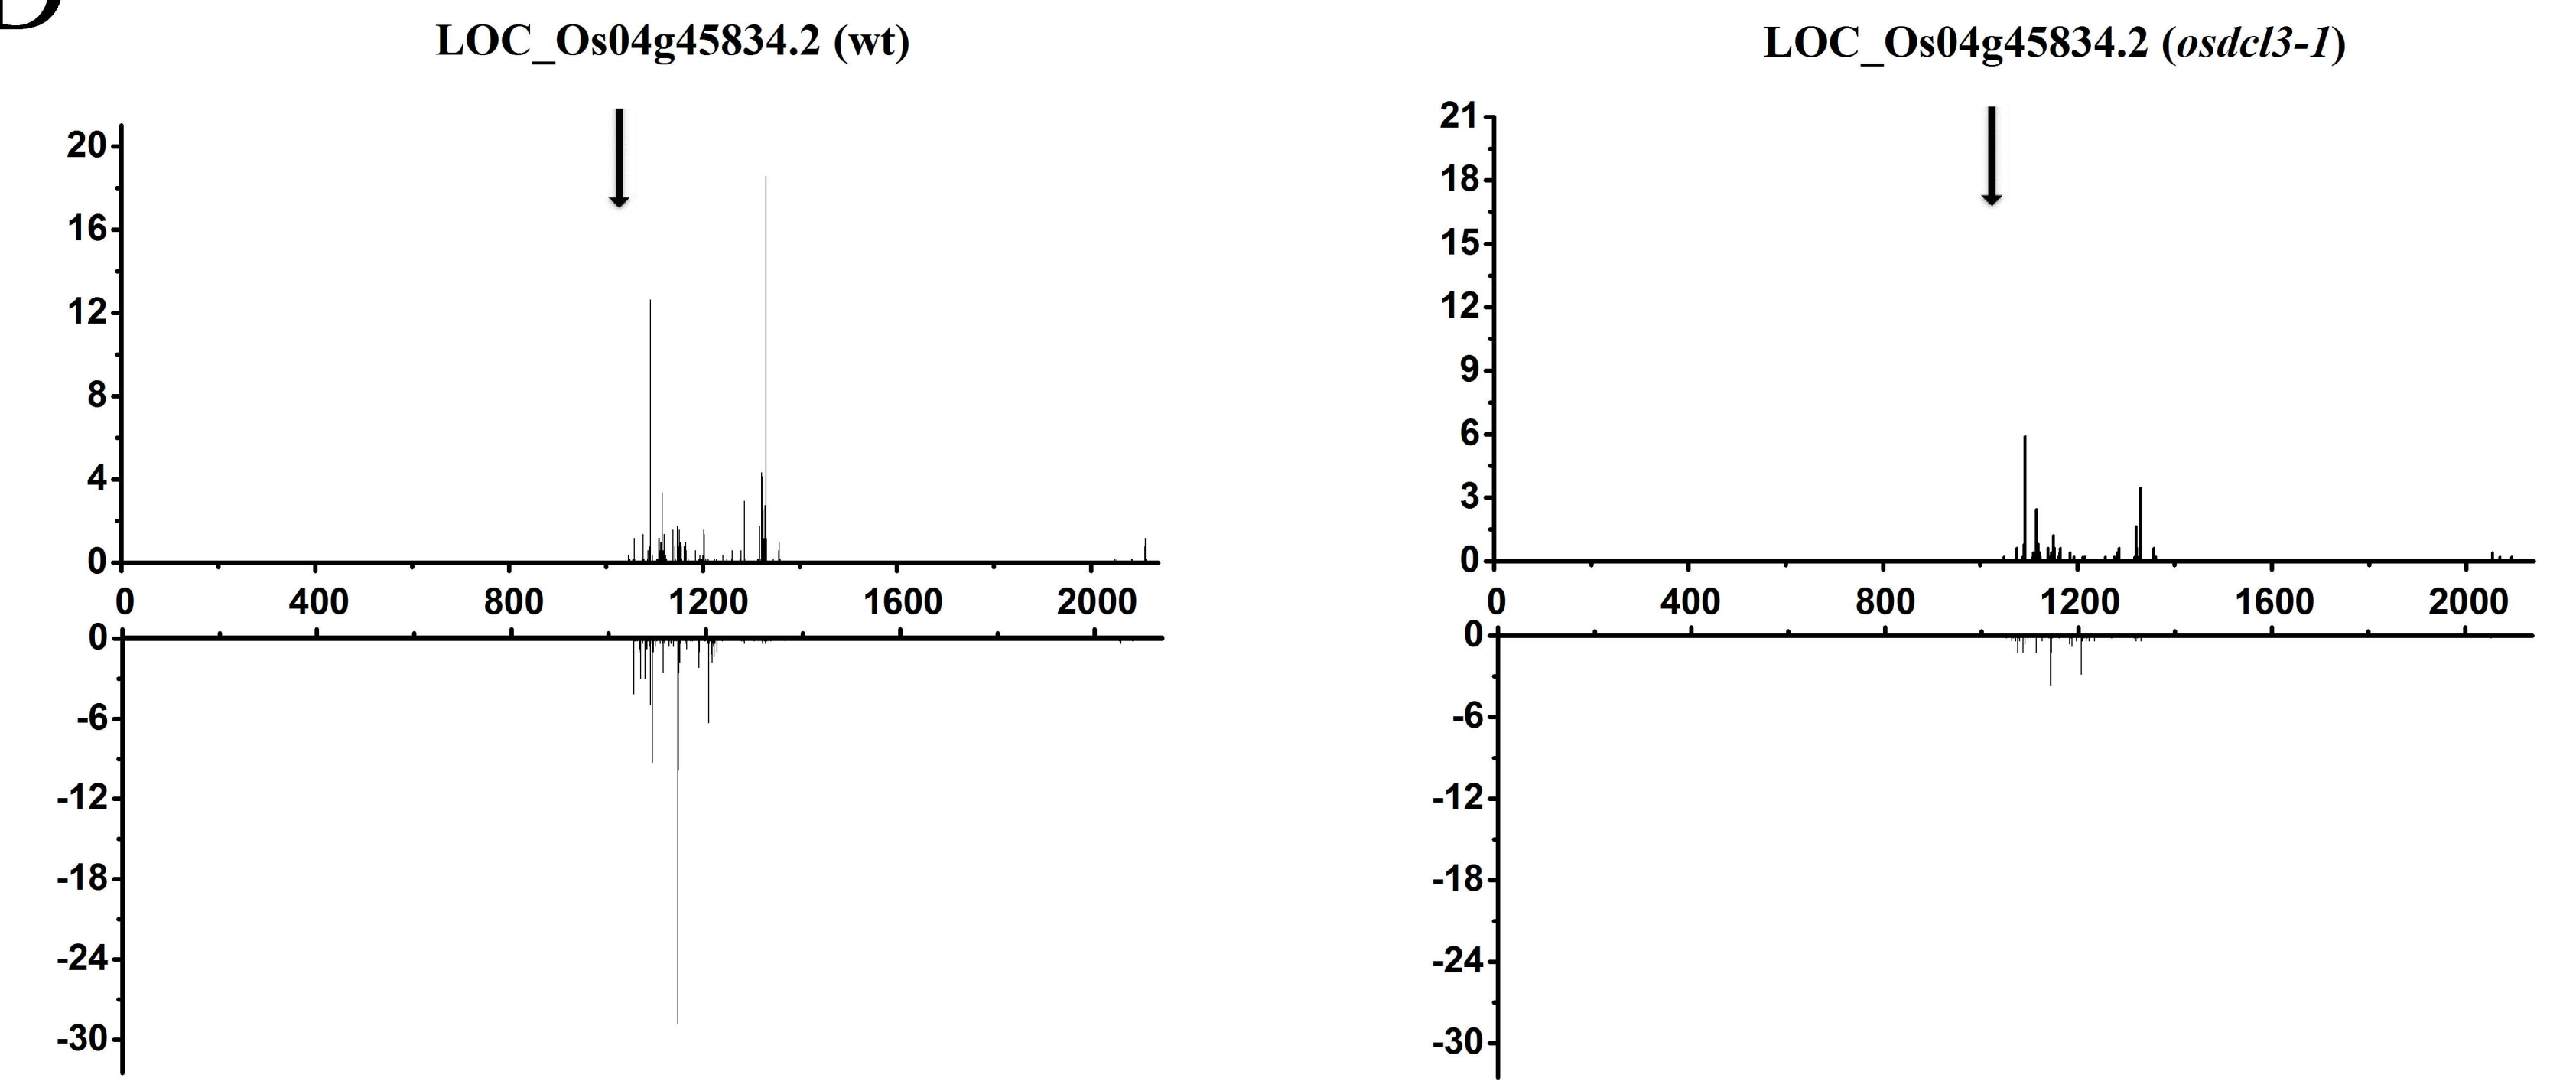**E**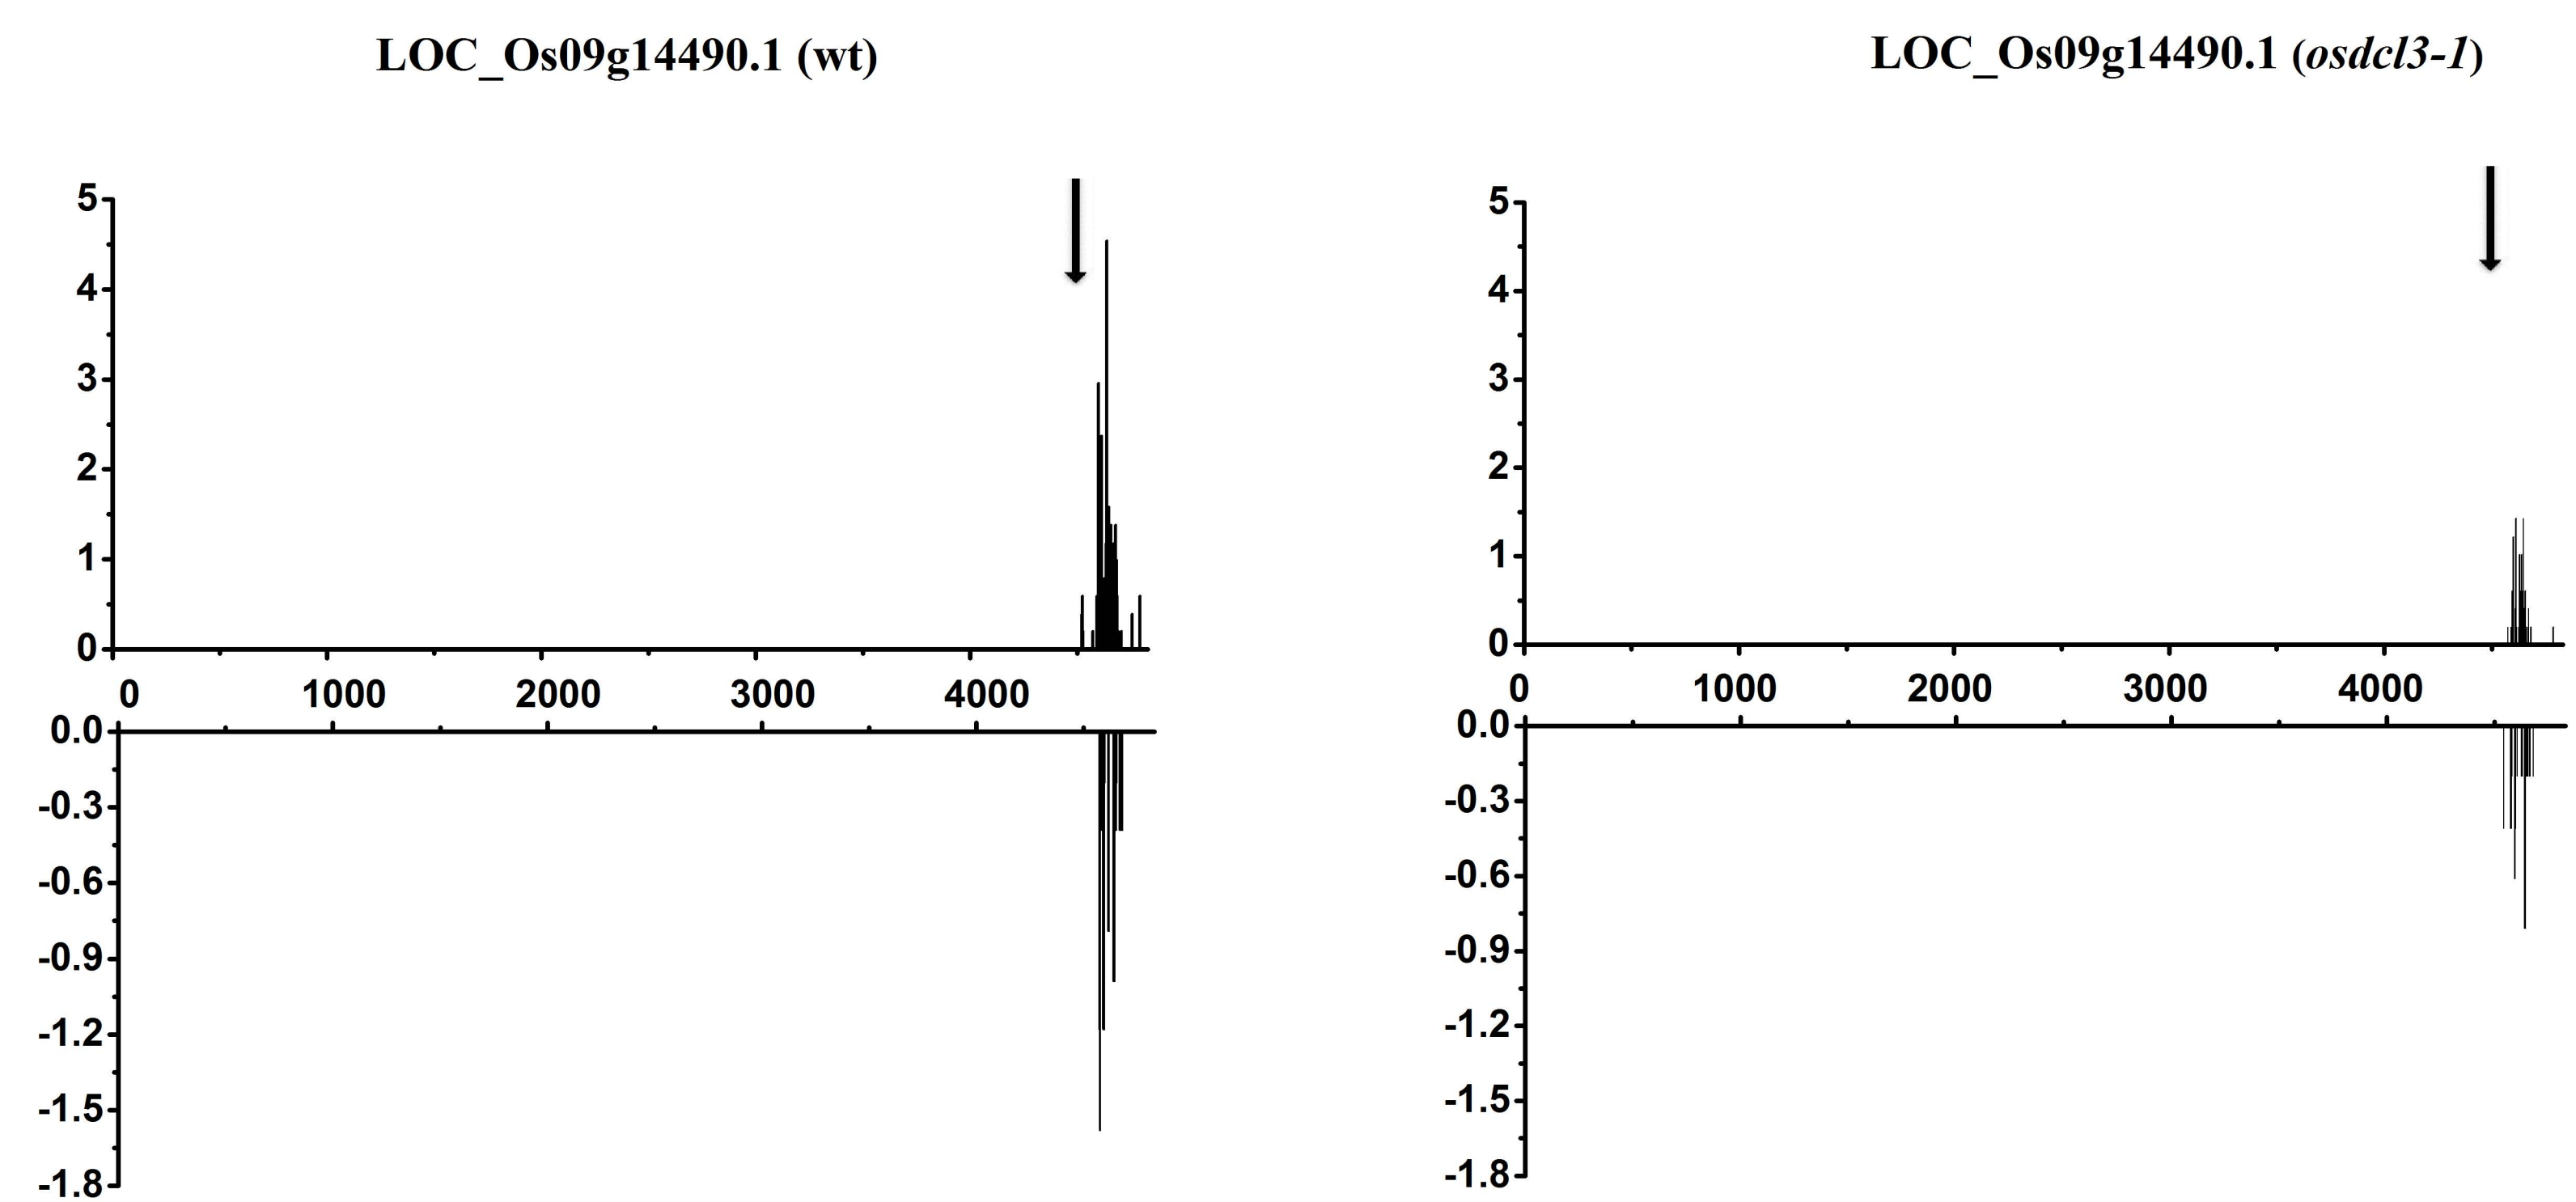

Supplement: 12864_2021_7406_MOESM4_ESM.pdf [file 12864_2021_7406_MOESM4_ESM.pdf]
